# Supplementary material for: Extracellular Vesicles Secreted by Pre-Hatching Bovine Embryos Produced In Vitro and In Vivo Alter the Expression of IFNtau-Stimulated Genes in Bovine Endometrial Cells
Source: MDPI journal article supplement (doi:10.3390/ijms24087438), 2023-04-18
Supplement: s1 [file s1]

### *Supplementary Material*

#### **Extracellular vesicles secreted by pre-hatching bovine embryos produced in vitro and in vivo alter the expression of IFN $\tau$ - stimulated genes in bovine endometrial cells**

Aguilera Constanza<sup>1</sup>, Velásquez Alejandra E<sup>1</sup>, Gutierrez-Reinoso Miguel Angel<sup>1</sup>, Wong Yat Sen<sup>1</sup>, Melo-Báez Bárbara<sup>1</sup>, Cabezas Joel<sup>1</sup>, Caamaño Diego<sup>1</sup>, Navarrete Felipe<sup>1</sup>, Rojas Daniela<sup>2</sup>, Castro Fidel Ovidio<sup>1</sup>, Rodríguez-Álvarez Lleretny<sup>1\*</sup>.

**\* Correspondence:**

Rodríguez-Álvarez Lleretny

llrodriguez@udec.cl

#### **1 Supplementary Figures**

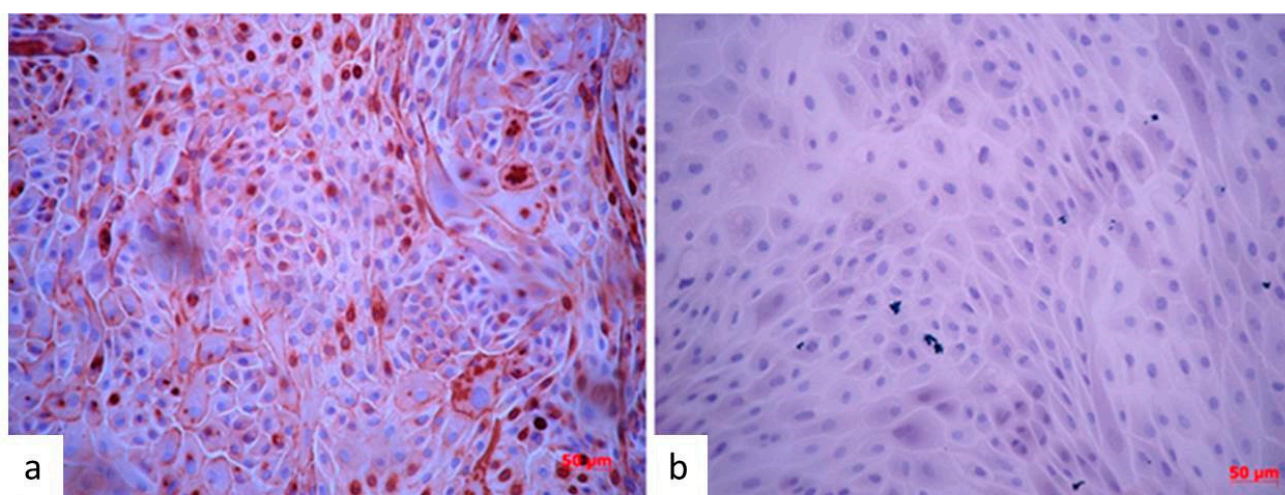

**Figure 1S.** Immunocytochemistry of cytokeratin. a) epithelial cells positive to cytokeratin , b) negative cells to vimentin stromal cell marker.

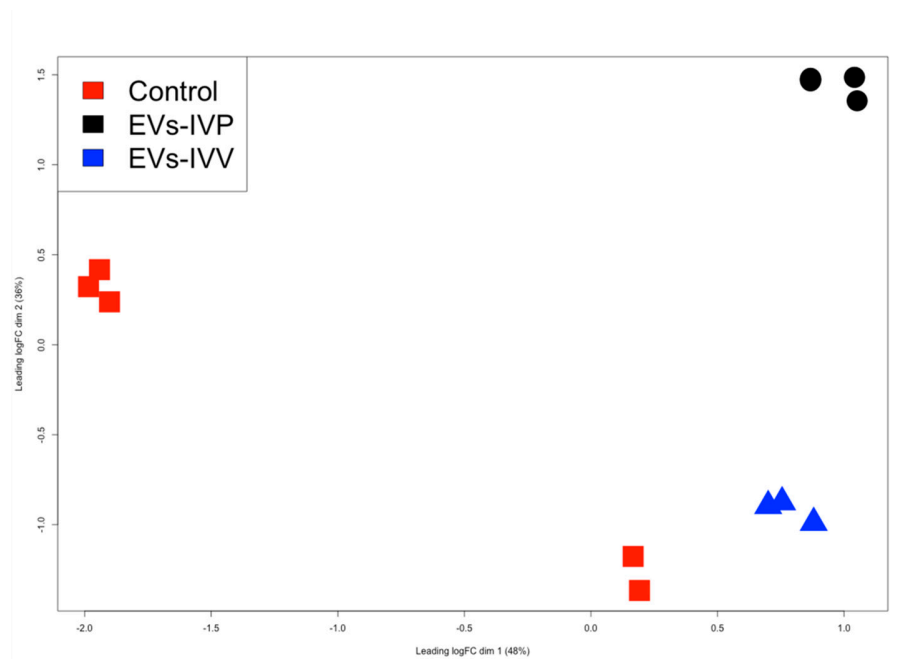

**Figure 2S.** Principal component analysis (PCA) of gene expression level in endometrial cells exposed to in vitro (EVs-IVP) or In vivo (EVs-IVV) EVs from bovine embryos. The PCA shows clusters of expressed genes that differ across the samples.

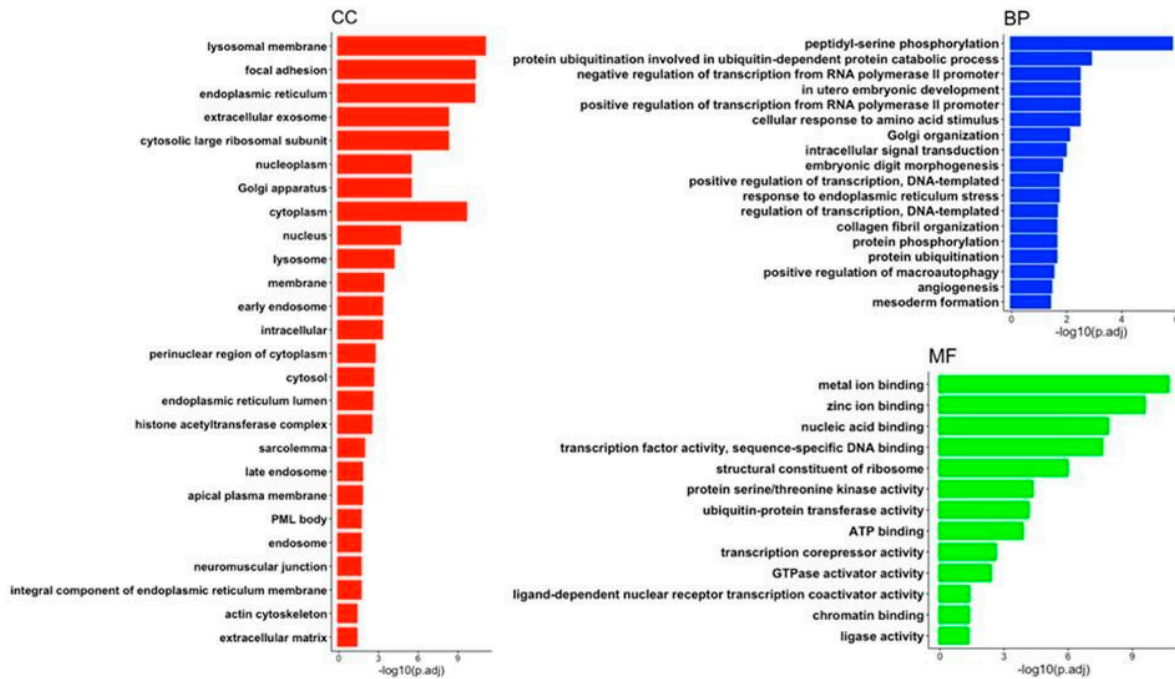

**Figure 3S.** G.O analysis based on DEGs between EVs-IVV and control. The significantly pathways were classified as biological process (BP), cellular component (CC) and molecular function (MF).

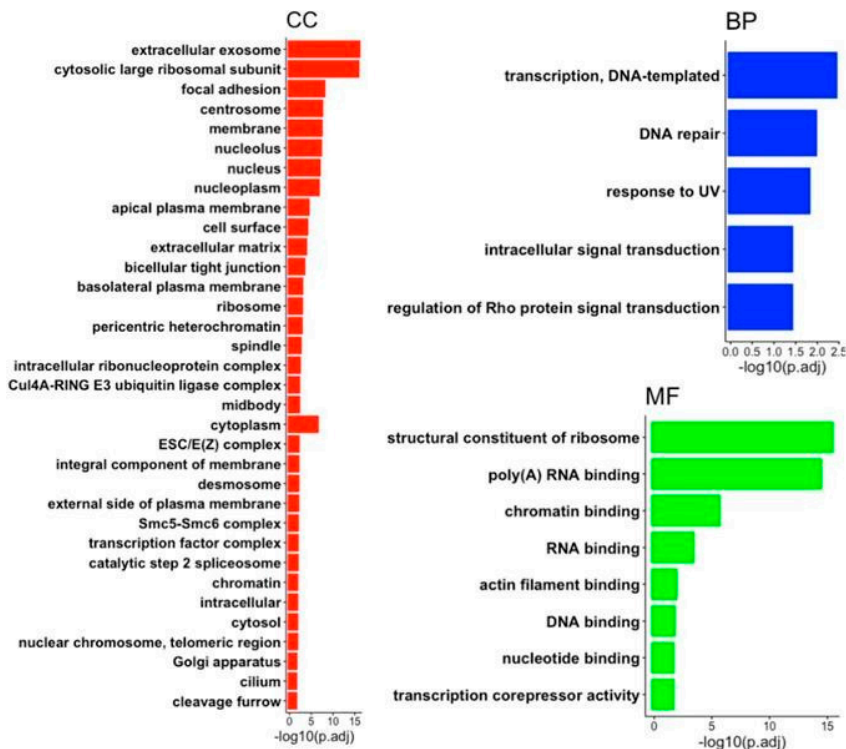

**Figure 4S.** G.O analysis based on DEGs between EVs-IVP and control. The significantly pathways were classified as biological process (BP), cellular component (CC) and molecular function (MF).

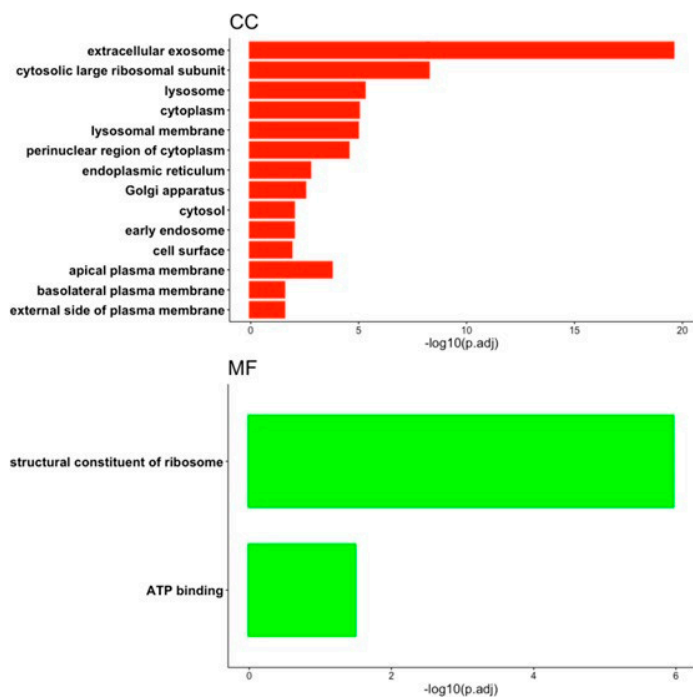

**Figure 5S.** G.O analysis based on DEGs between EVs-IVP and EVs-IVV. The significantly pathways were classified as biological process (BP), cellular component (CC) and molecular function (MF). Non biological process was up regulated by EVs-IVP in bEECs compared to EVs-IVV.

**Table 1S.** Number of reads sequence per sample and Mapping rates. More than 93% of the setof reads of each sample aligned one time and less than 4% aligned more than 1 time, with a total rate of alignment more than 98% reflecting the accurate of assembly using the genome reference ARS-VCD1.2

| Sample ID | Total Reads | Reads aligned 1 time | Reads aligned > 1 time | Total Aligment Rate |
|-----------|-------------|----------------------|------------------------|---------------------|
| Control1  | 28474603    | 27051719<br>(95.00%) | 933916<br>(3.28%)      | 99.07%              |
| Control2  | 23415608    | 22301271<br>(95.24%) | 768176<br>(3.28%)      | 99.18%              |
| Control3  | 28609208    | 27179707<br>(95.00%) | 953299<br>(3.33%)      | 99.13%              |
| Control4  | 21993991    | 20566496<br>(93.51%) | 822725<br>(3.74%)      | 98.59%              |
| Control5  | 25892496    | 24243743<br>(93.63%) | 891009<br>(3.44%)      | 98.47%              |
| EVs- IVV1 | 27239389    | 25600687<br>(93.98%) | 950207<br>(3.49%)      | 98.68%              |
| EVs- IVV2 | 24962780    | 23549901<br>(94.34%) | 822727<br>(3.30%)      | 98.77%              |
| EVs- IVV3 | 26056250    | 24559132<br>(94.25%) | 859209<br>(3.30%)      | 98.73%              |
| EVs- IVP1 | 24351896    | 23181076<br>(95.19%) | 800772<br>(3.29%)      | 99.16%              |
